# Supplementary material for: The multifaceted role of protein kinase CK2 in high-risk acute lymphoblastic leukemia
Source: PubMed Central journal article supplement — Haematologica. 2020 Aug 13;106(5):1461–5. doi: 10.3324/haematol.2020.246918 (PMC8094085; doi:10.3324/haematol.2020.246918), 2020-08-13

**The multifaceted role of protein kinase CK2 in high-risk acute lymphoblastic leukemia**

*Yun Zhou,<sup>1,2\*</sup> Haiwei Lian,<sup>2,3\*</sup> Ning Shen,<sup>2,4</sup> Sovannarith Korm,<sup>2</sup> Andrew Kwok Ping Lam,<sup>2</sup> Olivia Layton,<sup>2</sup> Leah N. Huiting,<sup>2</sup> Dun Li,<sup>2</sup> Kelly Miao,<sup>2</sup> Aozhuo Zeng,<sup>2</sup> Esther Landesman-Bollag,<sup>4</sup> David C. Seldin,<sup>4</sup> Hui Fu,<sup>3</sup> Li Hong<sup>1</sup> and Hui Feng<sup>2,4</sup>*

*<sup>1</sup>Department of Gynecology, Wuhan University Renmin Hospital, Wuhan, Hubei, P. R. China; <sup>2</sup>Department of Pharmacology and Experimental Therapeutics, Boston University School of Medicine, Boston, MA, USA; <sup>3</sup>Department of Anatomy and Embryology, Wuhan University School of Basic Medical Sciences, Wuhan, Hubei, P. R. China and <sup>4</sup>Department of Medicine, Section of Hematology and Medical Oncology, Boston University School of Medicine, Boston, MA, USA*

*\*YZ and HL contributed equally as co-first authors*

*Correspondence: HUI FENG - [hweifeng@bu.edu](mailto:hweifeng@bu.edu)*

*HONG LI - [drhongli1011@yeah.net](mailto:drhongli1011@yeah.net)*

*doi:10.3324/haematol.2020.246918*

## **Supplementary Information**

### **Materials and Methods**

#### **Fish husbandry**

Zebrafish (*Danio rerio*) husbandry was performed as described (1), in zebrafish facilities at the Boston University (BU) Medical Campus following protocols approved by the Institutional Animal Care and Use Committee at BU.

#### **Subcloning**

The human cDNA of wild-type *CK2α* (*CK2α<sub>wt</sub>*) and mutant *CK2α* (*CK2αK68M*) was amplified by PCR from pZW6 and pGV15 vector, respectively (2). Mutant *CK2αK68M* was previously generated by mutating the lysine (K) codon at amino acid position 68 to methionine (M), resulting in the loss of kinase activity (3). PCR products were subsequently cloned into the *I-SceI-lck/pKS* or *I-SceI-rag2/pKS* vector, containing a zebrafish *lck* or *rag2* promoter sequence and flanked by the *I-SceI* endonuclease recognition sites. The forward primer contained an Age-I enzyme site and *CK2α* translation start sequence. The reverse primer contained the *CK2α* translation termination codon and a *ClaI* enzyme site. PCR-purified fragments were digested with AgeI-HF and *ClaI* restriction enzymes and then cloned into the respective *I-SceI/pKS* vector through AgeI-HF and *ClaI* sites. Clones containing inserts were fully sequenced. PCR primer pairs used for amplification of *CK2α* cDNA are shown in Supplementary Table 1.

#### **Generation of stable *CK2α<sub>wt</sub>* and *CK2αK68M* transgenic fish**

The *I-SceI-lck:CK2α<sub>wt</sub>-I-SceI*, *I-SceI-rag2:CK2α<sub>wt</sub>-I-SceI*, and *I-SceI-lck:CK2αK68M-I-SceI* constructs were microinjected with meganuclease (New England Biolabs, Ipswich, MA, USA)

into *nacre* (*mitfa*<sup>-/-</sup>) zebrafish embryos at the one-cell stage of development, thereby generating mosaic F0 founder fish. The *I-SceI-lck:CK2 $\alpha$ wt-I-SceI* construct was co-injected with the *I-SceI-rag2:mCherry-I-SceI* construct as previously described (4). The founder fish were outcrossed and their progeny were screened for the presence of human *CK2 $\alpha$*  gene by gene-specific PCR.

#### **4-hydroxytamoxifen treatment and ALL monitoring**

The conditional zebrafish ALL model, *Tg(rag2:MYC-ER)*, was previously generated (5). In this transgenic fish line, the zebrafish *rag2* promoter drives the expression of human *MYC* fused to a modified estrogen receptor that binds to 4-hydroxytamoxifen (4HT, Sigma-Aldrich, St. Louis, MO, USA) but not endogenous estrogens (6). For all experiments described in this study, treatment with 4HT began at 5 dpf, and each clutch of larvae was placed in 1 L of water containing 50  $\mu$ g/L 4HT with a weekly water change. Zebrafish raised in 4HT were imaged weekly by fluorescent microscopy beginning at 5 weeks of age to monitor the onset of ALL as previously described (5). Fish were imaged by brightfield and GFP/mCherry fluorescent microscopy using an Olympus fluorescent dissecting microscope (MVX10; Olympus, Center Valley, PA, USA). Fluorescent and brightfield images were merged using Adobe Photoshop (version 7.0). The onset of ALL was defined as the development of a fluorescent mass that was more than twice the size of a normal thymus or kidney together with fluorescent-labeled cell infiltration into local tissues. All fish were genotyped for *MYC-ER*, *CK2 $\alpha$ wt*, or *CK2 $\alpha$ K68M* transgenes using genomic DNA extracted from the individual fish fin upon the completion of tumor surveillance. Genotyping primers are listed in Supplementary Table 2.

Tumor regression was monitored after the removal of 4HT from the fish water. Tumor fish were placed in individual tanks and imaged weekly for a total of 8 weeks after the removal of 4HT.

Based on the diameter of the largest contiguous tumor mass at the end of the 8-week monitoring period, tumor phenotypes were classified into 4 groups as described in the results section. Fish that became moribund with leukemia <8 weeks after 4HT removal were placed in the progression category. Genotyping for fish was performed as described above.

### **Protein extraction and Western blotting**

Whole-cell lysates were prepared from tumors in RIPA buffer (1% NP-40, 0.1% SDS, 50 mM Tris-HCl pH 7.4, 150 mM NaCl, 0.5% sodium deoxycholate, and 1 mM EDTA) supplemented with 1x or 2x Halt proteinase and phosphatase inhibitor cocktail (Thermo Scientific, Cambridge, MA, USA). To visualize the levels of phosphorylated MYC, a phosphate-binding molecule (Phos-Tag, AAL-107; FUJIFILM Wako Pure Chemical Co., Richmond, VA, USA) was used. Specifically, the 8% resolving gel for the SDS-PAGE was freshly prepared according to the manufacture's instruction with 0.04 mM MnCl<sub>2</sub> (Sigma, St. Louis, MO, USA) and 0.02 mM Phos-tag (TM) Acrylamide AAL-107 (FUJIFILM Wako Pure Chemical Co., Richmond, VA, USA). Primary antibodies included anti-CK2 (SC-9030, Santa Cruz Biotechnology, Dallas, TX, USA), anti-MYC (5605S, Cell Signaling, Danvers, MA, USA), and anti-ACTIN (SC-47778, Santa Cruz Biotechnology, Dallas, TX, USA). Secondary antibodies included horseradish-peroxidase-conjugated anti-mouse (31430, Thermo Scientific, Waltham, MA, USA) or anti-rabbit (65-6120, Thermo Scientific, Waltham, MA, USA) antibody. Autoradiographs were obtained with a G:BOX Chemi XT4 (Syngene, Frederick, MD, USA) and a CCD camera, and quantification analysis were performed using Syngene GeneTools software (Syngene, Frederick, MD, USA).

### **Pulse-chase analysis**

Premalignant thymi were isolated from *MYC-ER* and *MYC-ER;CK2 $\alpha$ wt* zebrafish. Specifically, adult zebrafish were euthanized in ice-cold fish water for approximately 10 minutes. The thymus of each fish was immediately dissected with sterilized forceps and kept in ice-cold 1x RPMI-1640 medium (Corning, NY, USA) supplemented with 10% FBS (Life Technology, Carlsbad, CA, USA). Cell suspensions were made by pipetting several times in medium, then aliquoted into 12-well plates (Thermo Scientific, Waltham, MA, USA), treated with 50  $\mu$ g/mL cycloheximide (Sigma, St. Louis, MO, USA), and collected at 0, 15, 30, 60, and 180 minutes post-treatment. Protein was then extracted for Western blotting analysis to detect MYC and Actin levels.

## **RT-PCR**

The tumor was dissected from each fish under a fluorescent microscope and subjected to RNA extraction using Trizol reagent (Thermo Scientific, Waltham, MA, USA) following the manufacturer's instruction. cDNA was synthesized with QuantiTect Reverse Transcription Kit (QIAGEN, Germantown, MA, USA). 100 ng of cDNA was used for semi-quantitative RT-PCR with gene-specific RT primers as previously described (7). Alternatively, 200 ng of cDNA was applied for qRT-PCR for anti-apoptotic genes with the SYBR green PCR master mix (Genecopoeia, Rockville, MD, USA) and a Step-One PCR instrument (Applied Biosystems, Foster City, CA, USA) according to the manufacturer's manual. The primer sequences for qRT-PCR are included in Supplementary Table 2.

## **Statistical analyses**

GraphPad Prism software (GraphPad Software, Inc., La Jolla, CA, USA) was used to calculate *p*-values using a log-rank test for Kaplan-Meier curves and two-tailed t-test for tumor burden and

anti-apoptotic gene expression. A two-way ANOVA test was used to calculate significance for tumor changes among fish groups after 4HT removal. *P*-values less than or equal to 0.05 were considered statistically significant.

## Supplementary Figure Legends

**Supplementary Figure 1. Overexpression of *CK2 $\alpha$*  promotes the survival of lymphocytes but does not induce leukemia in zebrafish.** (A) *CK2 $\alpha$*  protein expression in lymphocytes of wild-type (wt) and *Tg(lck:CK2 $\alpha$ wt;rag2:mCherry)* zebrafish. (B-C) GFP and/or mCherry fluorescence in the transgenic *Tg(lck:EGFP)* (left panels), *Tg(rag2:mCherry)* (middle panels), and *Tg(lck:CK2 $\alpha$ wt;rag2:mCherry)* (right panels) fish at 6 weeks (B) or 8 months (C) old. Scale bars in (B) = 1 mm and in (C) = 2 mm.

**Supplementary Figure 2. Overexpression of human *CK2 $\alpha$ wt* promotes leukemia aggressiveness in zebrafish.** (A) Representative images of *MYC-ER* (left, overlay of brightfield and GFP channel) and *MYC-ER;CK2 $\alpha$ wt* (middle and right panel, overlay of brightfield and RFP or GFP channel) fish at 8-month old. (B) Fluorescent intensity quantification of GFP channel of tumor from *MYC-ER* and *MYC-ER;CK2 $\alpha$ wt* fish ( $P=0.02$ ;  $n=6$  and  $8$ , respectively). Scale bars = 2 mm.

**Supplementary Figure 3. Similar to *MYC-ER* fish, *MYC-ER;CK2 $\alpha$ wt* fish develop both T and B-ALL.** Semi-quantitative RT-PCR analysis show that tumors from both *MYC-ER* and *MYC-ER;CK2 $\alpha$ wt* fish express T and B cell markers.

**Supplementary Figure 4. *CK2* phosphorylates and stabilizes MYC in leukemic cells from *MYC-ER;CK2 $\alpha$ wt* zebrafish.** (A) Western blotting analysis of *CK2* and MYC (phosphorylated [upper bands] and unphosphorylated [the lowest band]) in tumors dissected from individual *MYC-ER* and *MYC-ER;CK2 $\alpha$ wt* fish. The number above the upper bands of MYC are relative values of

the phosphorylated MYC versus the total MYC. (B) Cycloheximide (CHX) chase analysis of MYC stability in the premalignant thymus of *MYC-ER* and *MYC-ER;CK2 $\alpha$ wt* fish. Levels of Actin were analyzed as a loading control. MYC band intensities were normalized to the corresponding Actin levels, and the value for cells isolated immediately before CHX treatment was set to 100 for ease of comparison.

**Supplementary Figure 5. *CK2* overexpression does not increase the expression of anti-apoptotic genes.** qRT-PCR analysis of the transcript levels of zebrafish anti-apoptotic genes in leukemic cells from *MYC-ER* or *MYC-ER;CK2 $\alpha$ wt* fish (n=15 per group). Statistical analysis was performed using the two-tailed t-test.



## Supplementary Tables

### Supplementary Table 1. PCR primer pairs used for amplification of *CK2α* cDNA for subcloning

---

|         | Primer sequences (5'-3')                                           |
|---------|--------------------------------------------------------------------|
| Forward | GGGGACAAGTTTGTACAAAAAAGCAGGCTCACCACCGGTATGTCGGGAC<br>CCGTGCCAAGCAG |
| Reverse | GGGGACCACTTTGTACAAGAAAGCTGGGTATCGATTTACTGCTGAGCGCC<br>AGCGGCAG     |

---

## Supplementary Table 2. Genotyping or qRT-PCR primers

| Target gene                       | Primer sequences (5'-3')                                            |
|-----------------------------------|---------------------------------------------------------------------|
| <i>MYC-ER</i>                     | Forward: AGTCCTGAGACAGATCAGCA<br>Reverse: TCATCATGCGGAACCGACTT      |
| <i>CK2<math>\alpha</math>wt</i>   | Forward: ATGTCGGGACCCGTGCCAAGCAG<br>Reverse: TTACTGGCTTGAGAATTTTAAC |
| <i>CK2<math>\alpha</math>K68M</i> | Forward: ATGTCGGGACCCGTGCCAAGCAG<br>Reverse: TTACTGGCTTGAGAATCATAAC |
| <i>bcl2a</i>                      | Forward: AGATGGCGTCCCAGGTAGAT<br>Reverse: GAAGGCATCCCAACCTCCAT      |
| <i>bcl2l1</i>                     | Forward: AGGGCTTGTTTGCTTGGTTG<br>Reverse: GCAATGGCTCATACCCATAACAC   |
| <i>mcl1a</i>                      | Forward: GTCACTAACTGGGGCCGAAT<br>Reverse: AACCCATGCCAGCTCTTGTT      |

## Supplementary References

1. Westerfield M. *The Zebra fish Book: A Guide for the Laboratory Use of Zebra fish (Brachydanio rerio)* Eugene, OR, USA: University of Oregon Press. 1994.
2. Vilk G, Saulnier RB, St Pierre R, Litchfield DW. Inducible expression of protein kinase CK2 in mammalian cells. Evidence for functional specialization of CK2 isoforms. *J Biol Chem.* 1999;274(20):14406-14414.
3. Penner CG, Wang Z, Litchfield DW. Expression and localization of epitope-tagged protein kinase CK2. *J Cell Biochem.* 1997;64(4):525-537.
4. Rembold M, Lahiri K, Foulkes NS, Wittbrodt J. Transgenesis in fish: efficient selection of transgenic fish by co-injection with a fluorescent reporter construct. *Nat Protoc.* 2006;1(3):1133-1139.
5. Gutierrez A, Grebliunaite R, Feng H, et al. Pten mediates Myc oncogene dependence in a conditional zebrafish model of T cell acute lymphoblastic leukemia. *J Exp Med.* 2011;208(8):1595-1603.
6. Littlewood TD, Hancock DC, Danielian PS, Parker MG, Evan GI. A modified oestrogen receptor ligand-binding domain as an improved switch for the regulation of heterologous proteins. *Nucleic Acids Res.* 1995;23(10):1686-1690.
7. Garcia EG, Iyer S, Garcia SP, et al. Cell of origin dictates aggression and stem cell number in acute lymphoblastic leukemia. *Leukemia.* 2018;32(8):1860-1865.

A

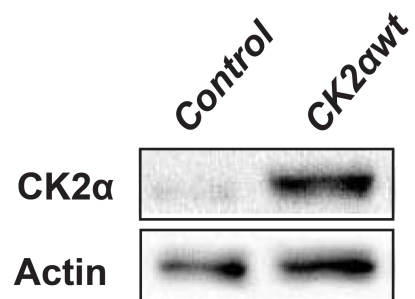

B

*Tg(lck:EGFP)**Tg(rag2:mCherry)**Tg(lck:CK2 $\alpha$ wt;rag2:mCherry)*

6 weeks

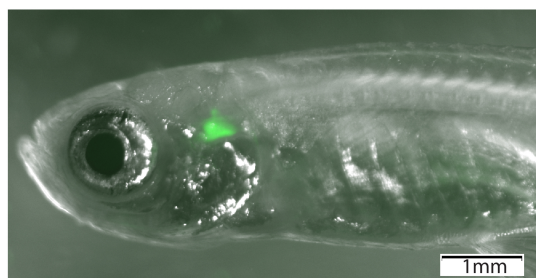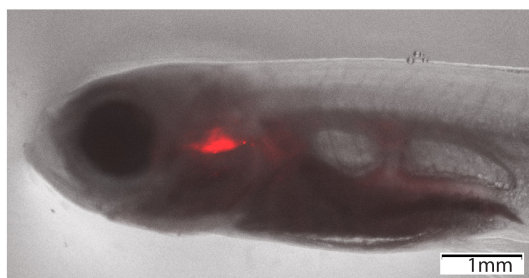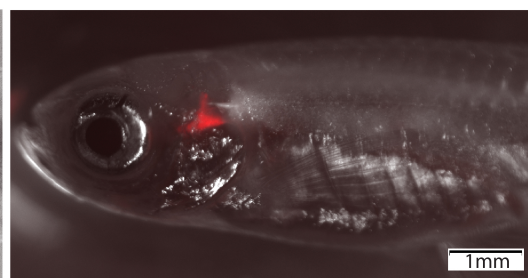

C

*Tg(lck:EGFP)**Tg(rag2:mCherry)**Tg(lck:CK2 $\alpha$ wt;rag2:mCherry)*

8 months

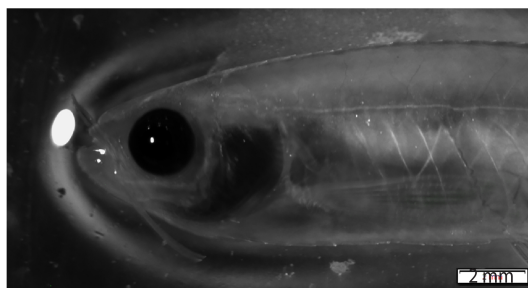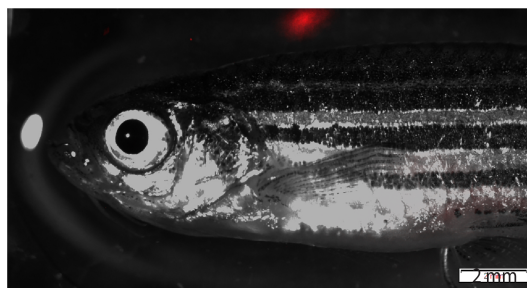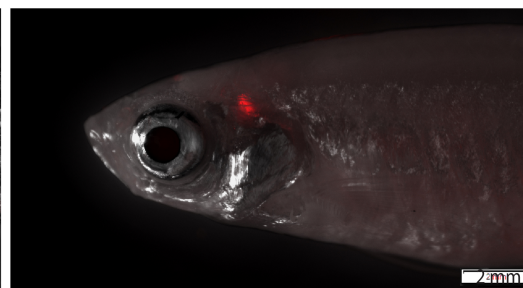

A

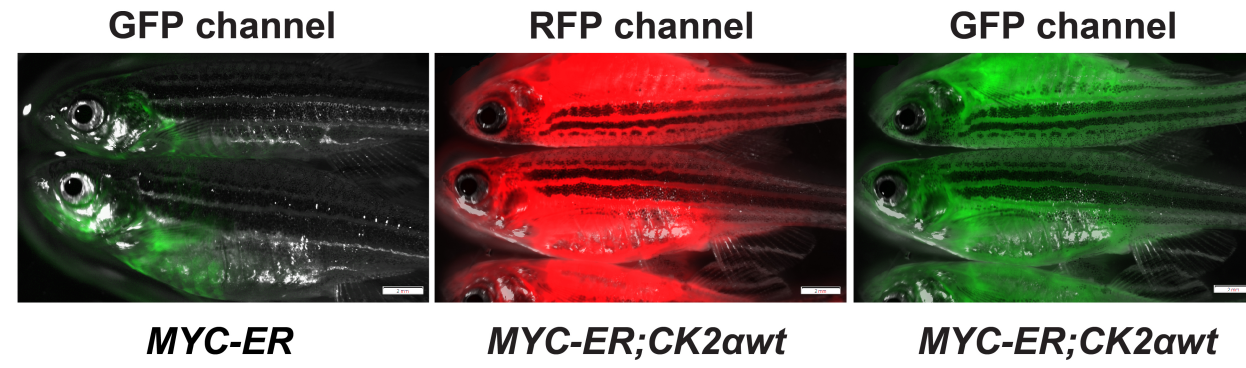

B

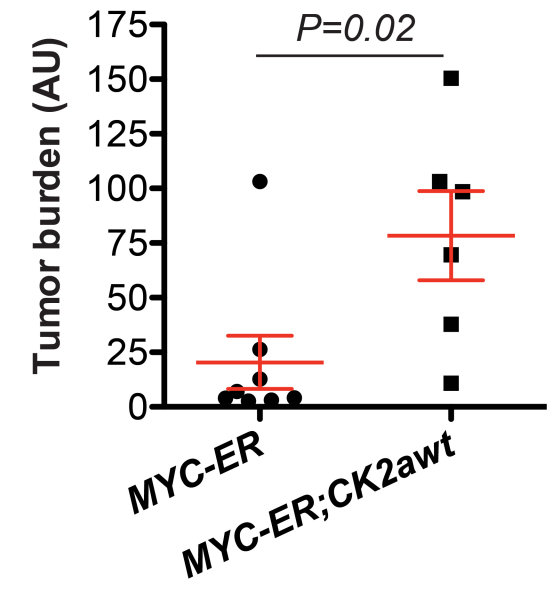

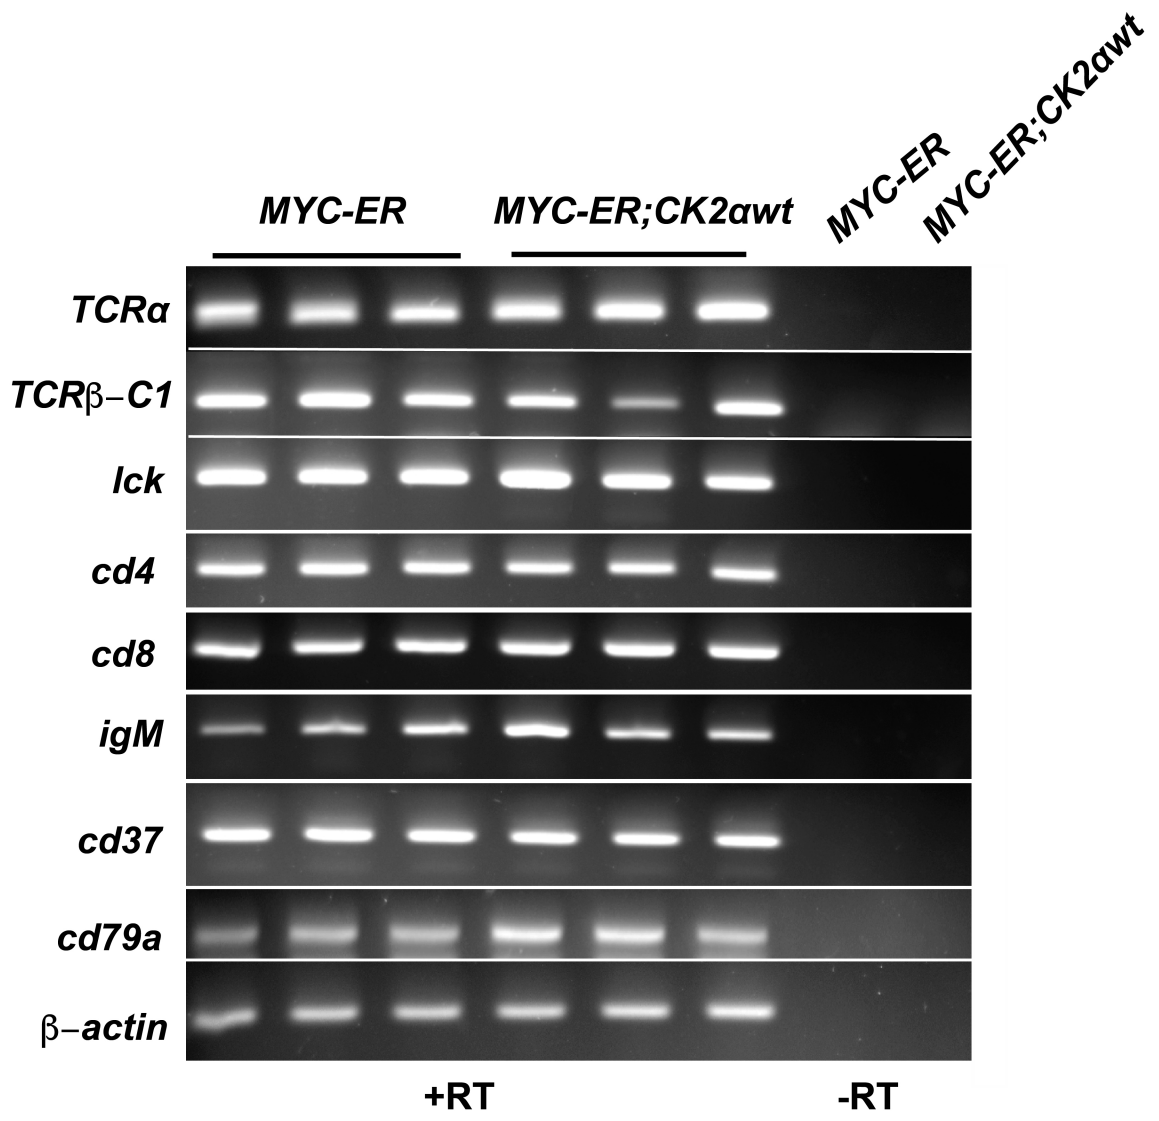

Supplementary Figure 3

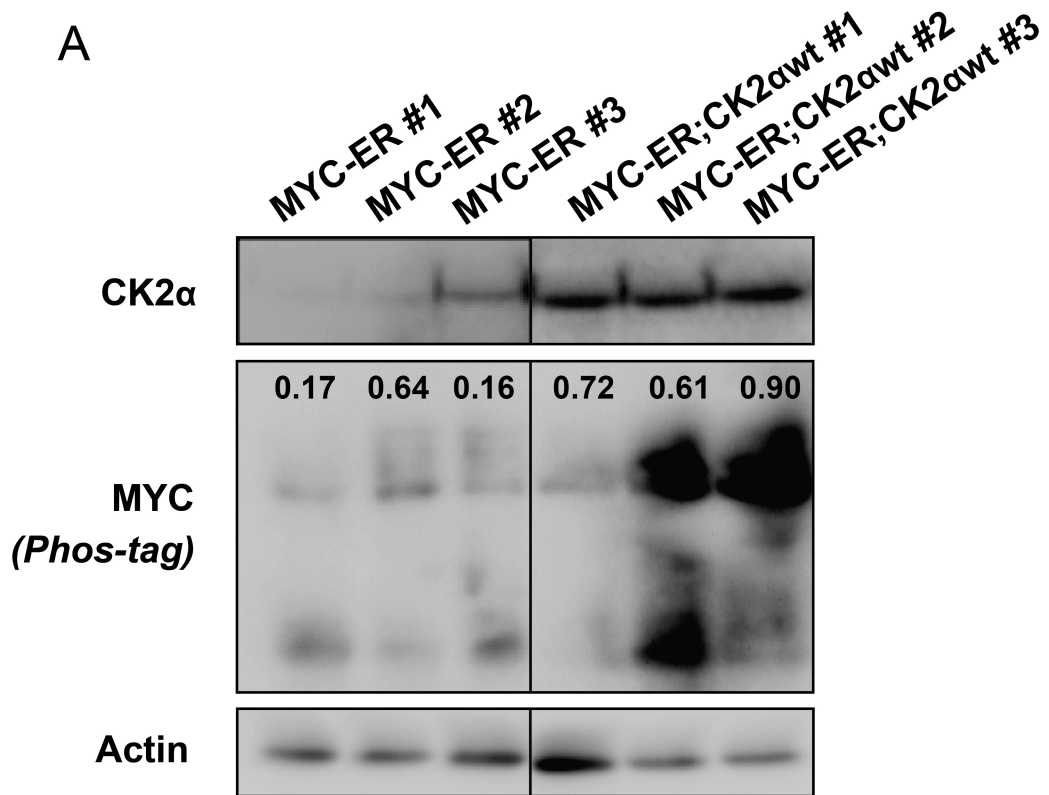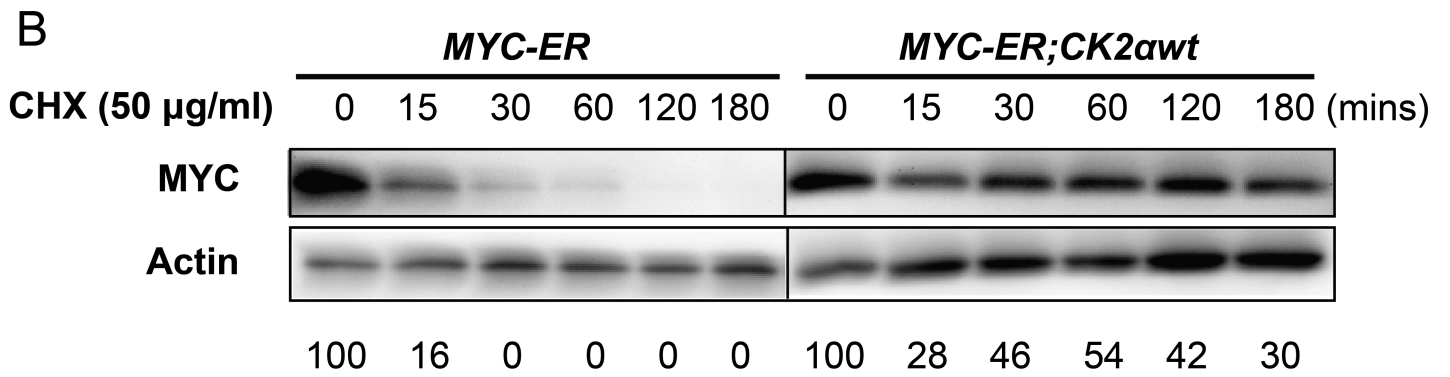

*bcl2a*

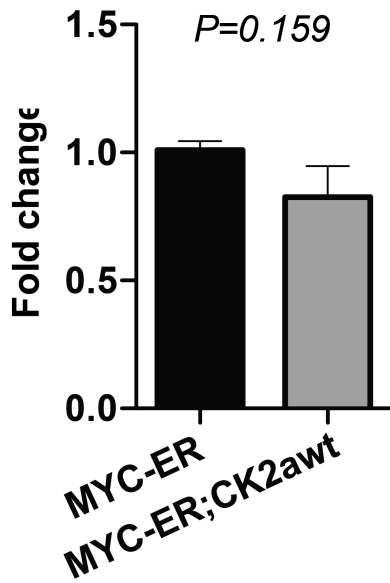

*bcl2l1*

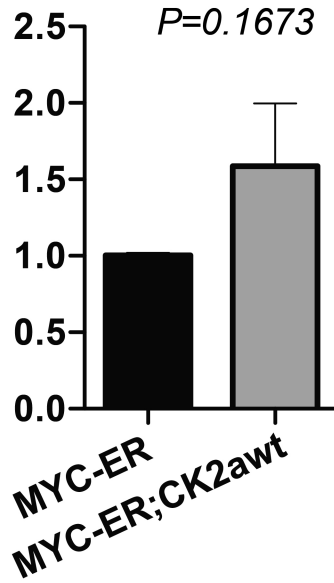

*mcl1a*

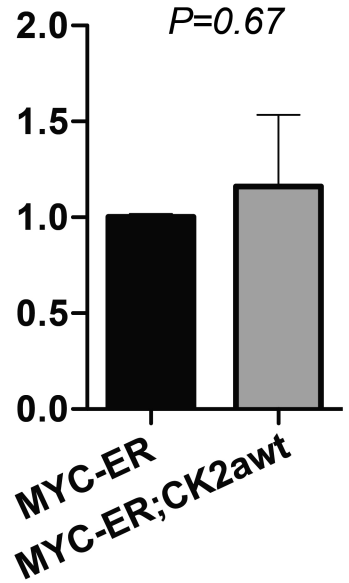

Supplement: 2020_246918_ZHOU_SUPPL.pdf [file 2020_246918_ZHOU_SUPPL.pdf]
