# Supplementary material for: The multifaceted role of protein kinase CK2 in high-risk acute lymphoblastic leukemia
Source: PubMed Central journal article supplement — Haematologica. 2020 Aug 13;106(5):1461–5. doi: 10.3324/haematol.2020.246918 (PMC8094085; doi:10.3324/haematol.2020.246918), 2020-08-13
Supplement: 2020_246918-DisclosuresContributions.pdf [file 2020_246918-DisclosuresContributions.pdf]

Haematologica  
HAEMATOL/2020/246918  
Version 3

The multifaceted role of protein kinase CK2 in high-risk acute  
lymphoblastic leukemia

Yun Zhou, Haiwei Lian, Ning Shen, Sovannarith Korm, Andrew Kwok  
Ping Lam, Olivia Layton, Leah N. Huiting, Dun Li, Kelly Miao, Aozhuo  
Zeng, Esther Landesman-Bollag, David C. Seldin, Hui Fu, Li Hong, and  
Hui Feng

Disclosures: The authors declare no conflict of interest.

Contributions: Conceptualization: H. Feng, D.C.S., E.B., D.L., Y.Z., H.W.L.; Methodology, Y.Z., H.W.L, D.L.; Validation, O.L., and A.L.; Formal Analysis, Y.Z., H.W.L, A.L. and O.L.; Investigation, Y.Z., H.W.L, S.K, N.S., L.N.H, A.L., O.L., K.M., A.Z., and E.B.; Resources, H. Fu, D.C.S., and E.B.; Data Curation, Y.Z., H.W.L, S.K, N.S., L.N.H, O.L., and A.L.; Writing-Original Draft Preparation, Y.Z., H.W.L., L.N.H, H.Feng; Writing-Review & Editing, H.Feng, H.Fu, S.K, N.S., O.L, A.L., and L.H.; Supervision, H.Feng, H. Fu, and L.H.
